# Supplementary material for: Born small, die young: Intrinsic, size-selective mortality in marine larval fish
Source: PubMed Central journal article supplement (PMC4657020; doi:10.1038/srep17065), 2015-11-24
Supplement: srep17065-s1.pdf [file srep17065-s1.pdf]

## Supplementary Material

### **Born small, die young: Intrinsic, size-selective mortality in marine larval fish**

Garrido, S.<sup>1,2\*</sup>, Ben-Hamadou, R.<sup>3\*</sup>, Santos A.M.<sup>1</sup>, Ferreira, S.<sup>1</sup>, Teodósio, M.A.<sup>4</sup>, Cotano, U.<sup>5</sup>, Irigoien, X.<sup>5,#</sup>, Peck, M.A.<sup>6</sup>, Saiz, E.<sup>7</sup>, and Ré, P.<sup>2</sup>

<sup>1</sup>Instituto Português do Mar e da Atmosfera, Av. Brasília s/n, 1449-006 Lisboa, Portugal.

<sup>2</sup>Marine and Environmental Sciences Centre, Faculdade de Ciências, Universidade de Lisboa, Campo Grande, 1749-016 Lisboa, Portugal.

<sup>3</sup>Department of Biological and Environmental Sciences, College of Arts and Sciences, Qatar University, PO Box 2713, Doha, Qatar.

<sup>4</sup>Centro de Ciências do Mar do Algarve, Universidade do Algarve. Campus de Gambelas, 8005-139 Faro, Portugal.

<sup>5</sup>Marine Research Unit – AZTI Foundation, Herrera Kaia, Portualdea z/g , 20110 Pasaia,, Spain.

<sup>6</sup>Institute for Hydrobiology and Fisheries Science, Hamburg University, Grosse Elbstrasse 133, 22765 Hamburg, Germany.

<sup>7</sup> Institut de Ciències del Mar - CSIC, Ps. Marítim de la Barceloneta 37-49, 08003 Barcelona, Spain.

# Present address: Red Sea Research Center, King Abdullah University for Science and Technology, 23955-6900 Thuwal, Saudi Arabia.

Table of contents

**Table S1. Compiled information about regressions reported in Fig. 2, 4, 5, 6 and 7**

Supplementary Table S1: Compiled information about regressions reported in Fig. 2, 4, 5, 6 and 7

| Figures                                                                                                                                                                                                                                           | Regression equations                      | Confidence interval (95% confidence bounds) |               | Goodness of fit   |                                  |
|---------------------------------------------------------------------------------------------------------------------------------------------------------------------------------------------------------------------------------------------------|-------------------------------------------|---------------------------------------------|---------------|-------------------|----------------------------------|
|                                                                                                                                                                                                                                                   |                                           | Regression coefficient (Slope)              | Intercept     | Adjusted R-square | One-tailed probability (P-value) |
| Figure 2A - Growth of sardine larvae reared in the laboratory under starvation                                                                                                                                                                    | $Y = 0.254 X + 3.86$                      | 0.246 - 0.262                               | 3.79 - 3.92   | 0.85              | 0.00007                          |
| Figure 4 – Relationship between otolith hatch check diameter ( $\mu\text{m}$ ) and larvae size-at-hatch (total length, $\text{mm}$ ) for sardine larvae reared in the laboratory under optimal feeding conditions                                 | $Y = 0.156 X + 1.96$                      | 0.114 - 0.198                               | 1.52 - 2.4    | 0.25              | 0.0007                           |
| Figure 5 – Relation between sardine larvae age (days post-hatch) and otolith first increment check diameter ( $\mu\text{m}$ ) for European sardine ( <i>Sardina pilchardus</i> ) larvae reared in the laboratory under optimal feeding conditions | 10th percentile:<br>$Y = 0.142 X + 9.38$  | 0.039 - 0.244                               | 9.28 - 9.48   | 0.6052            | 0.00003                          |
|                                                                                                                                                                                                                                                   | 50th percentile:<br>$Y = 0.088 X + 11.29$ | -0.014 - 0.190                              | 11.19 - 11.39 | 0.5232            | 0.0084                           |
|                                                                                                                                                                                                                                                   | 90th percentile:<br>$Y = 0.035 X + 13.2$  | -0.103 - 0.173                              | 13.09 - 13.30 | 0.393             | 0.013                            |
| Figure 6 – Relation between sardine larvae age (days post-hatching) and otolith first increment check diameter ( $\mu\text{m}$ ) for European sardine ( <i>Sardina pilchardus</i> ) larvae reared in the laboratory under starvation.             | 10th percentile:<br>$Y = 0.327 X + 8.13$  | 0.224 - 0.429                               | 8.03 - 8.23   | 0.694             | 0.000002                         |
|                                                                                                                                                                                                                                                   | 50th percentile:<br>$Y = 0.207 X + 10.68$ | 0.105 - 0.309                               | 10.58 - 10.78 | 0.723             | $< 10^{-10}$                     |
|                                                                                                                                                                                                                                                   | 90th percentile:<br>$Y = 0.087 X + 13.24$ | -0.015 - 0.189                              | 13.14 - 13.34 | 0.203             | 0.13                             |
| Figure 7 – Relation between sardine larvae age (Days post-hatching) and otolith first increment check diameter ( $\mu\text{m}$ ) for larvae captured in the Bay of Biscay.                                                                        | 10th percentile:<br>$Y = 0.12 X + 3.8$    | 0.015 - 0.225                               | 3.69 - 3.9    | 0.424             | 0.039                            |
|                                                                                                                                                                                                                                                   | 50th percentile:<br>$Y = 0.068 X + 5.8$   | -0.037 - 0.173                              | 5.69 - 5.90   | 0.563             | 0.007                            |
|                                                                                                                                                                                                                                                   | 90th percentile:<br>$Y = 0.017 X + 7.8$   | -0.088 - 0.122                              | 7.69 - 7.90   | 0.398             | 0.045                            |
